# Supplementary material
Source: PubMed Central journal article supplement (PMC6816271)
Supplement: NIHMS1042355-supplement-1.pdf [file NIHMS1042355-supplement-1.pdf]

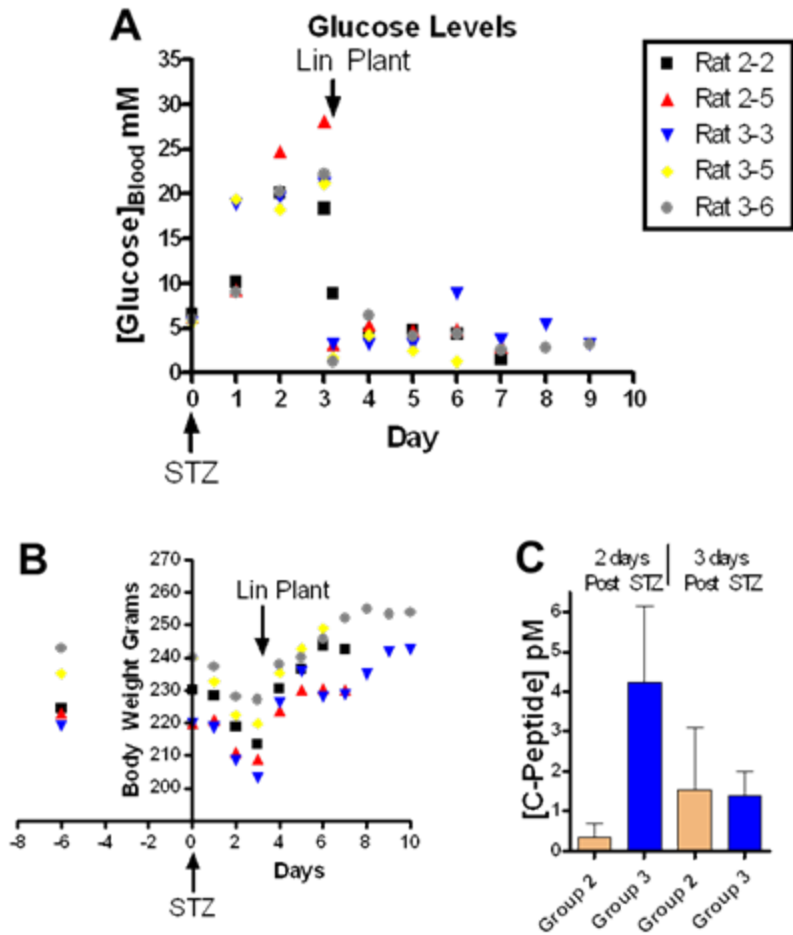

**Supplemental Figure 1 – Streptozotocin induced diabetes.** Panel A shows the daily blood glucose concentration of the rats in this trial immediately before and daily after STZ administration. The blood glucose concentration was measured twice on the third day post STZ administration, once before insertion of the Lin Plant and once 4 hours after the insertion of the Lin Plant. Times of STZ administration and Lin Plant insertion are denoted by arrows in both Panel A and B. Panel B shows the body weights of the rats 6 days prior to the STZ injection and their weights for the following 10 days. Panel C shows the average hC-peptide blood concentration for the respective groups on the second and third day post STZ injection.

| <b>Antigen</b>     | <b>Supplier</b>             | <b>Catalog Number</b> | <b>Dilution</b> |
|--------------------|-----------------------------|-----------------------|-----------------|
| <b>Glucagon</b>    | Sigma Aldrich St. Louis, MO | G2654                 | 1:500           |
| <b>Insulin</b>     | DAKO Carpinteria, CA        | A056401-2             | 1:500           |
| <b>Urocortin 3</b> | BACHEM Torrance, CA         | T-4761                | 1:500           |
| <b>PDX1</b>        | R&D Minneapolis, MN         | MAB2419               | 1:200           |
| <b>FOXA2</b>       | Santa Cruz Dallas, TX       | SC-6554               | 1:200           |
| <b>NKX6.1</b>      | DSHB Iowa City, IA          | F64A6B4-c             | 1:200           |
| <b>C-PEPTIDE</b>   | DSHB Iowa City, IA          | GN-ID4-c              | 1:500           |
| <b>VWF</b>         | DAKO Carpinteria, CA        | A0082                 | 1:100           |

**Supplemental Table 1 – Antibody Table.** Table of antibodies used in the trial.

| Gene    | TaqMan Probe  |
|---------|---------------|
| NANOG   | Hs04260366_g1 |
| POU5F1  | Hs00999634_gH |
| SOX2    | Hs01053049_s1 |
| NODAL   | Hs00415443_m1 |
| FOXA2   | Hs00232764_m1 |
| MEOX1   | Hs00244943_m1 |
| THY1    | Hs00264235_s1 |
| COL6A1  | Hs01095585_m1 |
| PDX1    | Hs00236830_m1 |
| SOX9    | Hs01001343_g1 |
| PTF1A   | Hs00603586_g1 |
| CPB1    | Hs00157026_m1 |
| BHLHA15 | Hs00703572_s1 |
| HNF1B   | Hs01001602_m1 |
| NKX6.1  | Hs00232355_m1 |
| ONECUT1 | Hs00413554_m1 |
| GLIS3   | Hs00541450_m1 |
| NEUROG3 | Hs01875204_s1 |
| NEUROD1 | Hs01922995_s1 |
| GCG     | Hs01031536_m1 |
| SST     | Hs00356144_m1 |
| INS     | Hs02741908_m1 |
| MAFA    | Hs01651425_s1 |
| SLC30A8 | Hs00545183_m1 |
| HEPCAM2 | Hs01650957_m1 |
| VDR     | Hs00172113_m1 |
| HHEX    | Hs00242160_m1 |
| ALB     | Hs00910225_m1 |
| CDX2    | Hs01078080_m1 |
| GAPDH   | Hs02758991_g1 |

**Supplemental Table 2 –TaqMan Probes Table.** Table of the TaqMan probes used in the generation of Figure 1.
